# Supplementary material for: Enhanced skin adhesive property of electrospun α-cyclodextrin/nonanyl group-modified poly(vinyl alcohol) inclusion complex fiber sheet
Source: Royal Society of Chemistry journal article supplement (doi:10.1039/d1ra00422k), 2021-01-01
Supplement: d1ra00422k1.pdf [file d1ra00422k1.pdf]

## Supporting Information

# Enhanced Skin Adhesive Property of Electrospun $\alpha$ -cyclodextrin/Nonanyl Group-modified Poly(vinyl alcohol) Inclusion Complex Fiber Sheet

Xi Chen and Tetsushi Taguchi \*

Polymers and Biomaterials Field, Research Center for Functional Materials, National Institute for Materials Science, 1-1 Namiki, Tsukuba, Ibaraki 305-0044, Japan

First author

Tel: +81-29-851-8746

Fax: +81-29-860-4752

E-mail: [CHEN.Xi2@nims.go.jp](mailto:CHEN.Xi2@nims.go.jp)

\*Corresponding author

Tel: +81-29-851-4498

Fax: +81-29-860-4752

E-mail: [TAGUCHI.Tetsushi@nims.go.jp](mailto:TAGUCHI.Tetsushi@nims.go.jp)

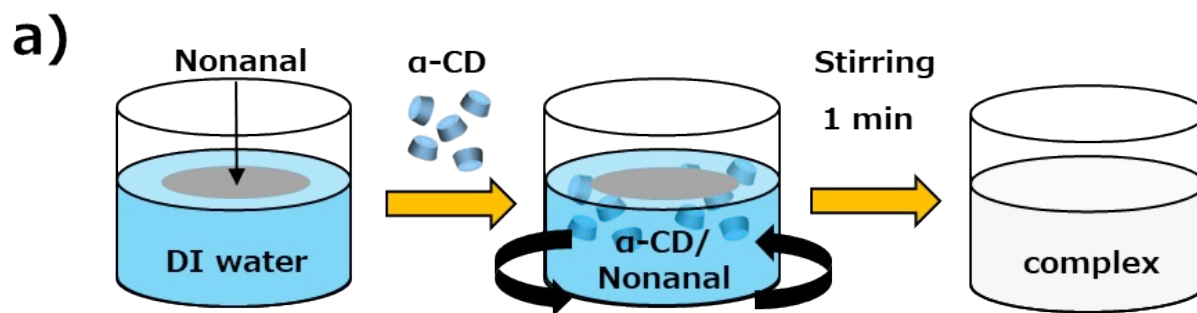

b)

|                                     |   |         |       |       |      |
|-------------------------------------|---|---------|-------|-------|------|
| $\alpha$ -CD (mM)                   | 0 | 7       | 14.1  | 28.2  | 28.2 |
| Nonanal (mg/mL)                     | 2 | 2       | 2     | 2     | 0    |
| Molar ratio ( $\alpha$ -CD/Nonanal) | - | 0.5 : 1 | 1 : 1 | 2 : 1 | -    |

**Figure S1.** Confirmation of inclusion complex formation. a) The procedure for preparing  $\alpha$ -CD/nonanal inclusion complex. b) Photographs showing  $\alpha$ -CD/nonanal inclusion complex formation in DI water.

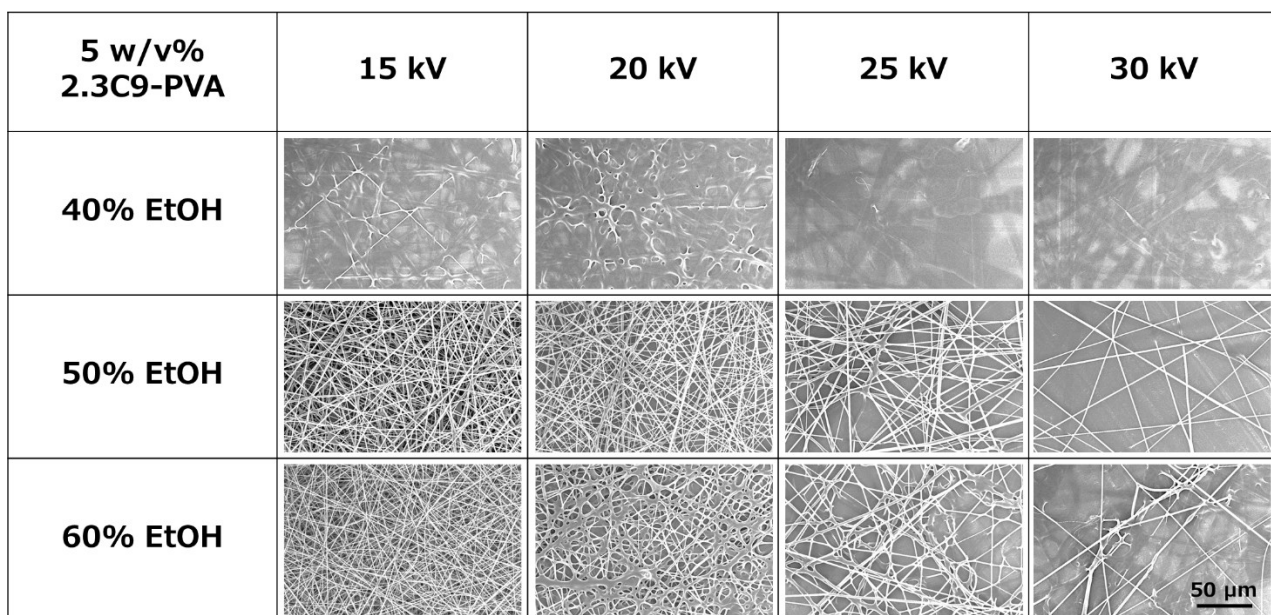

**Figure S2.** SEM images of electrospun fiber sheets using different 2.3C9-PVA solutions (5 w/v %, 40–60 % EtOH) under the voltage of 15–30 kV (scale bar = 50  $\mu$ m).

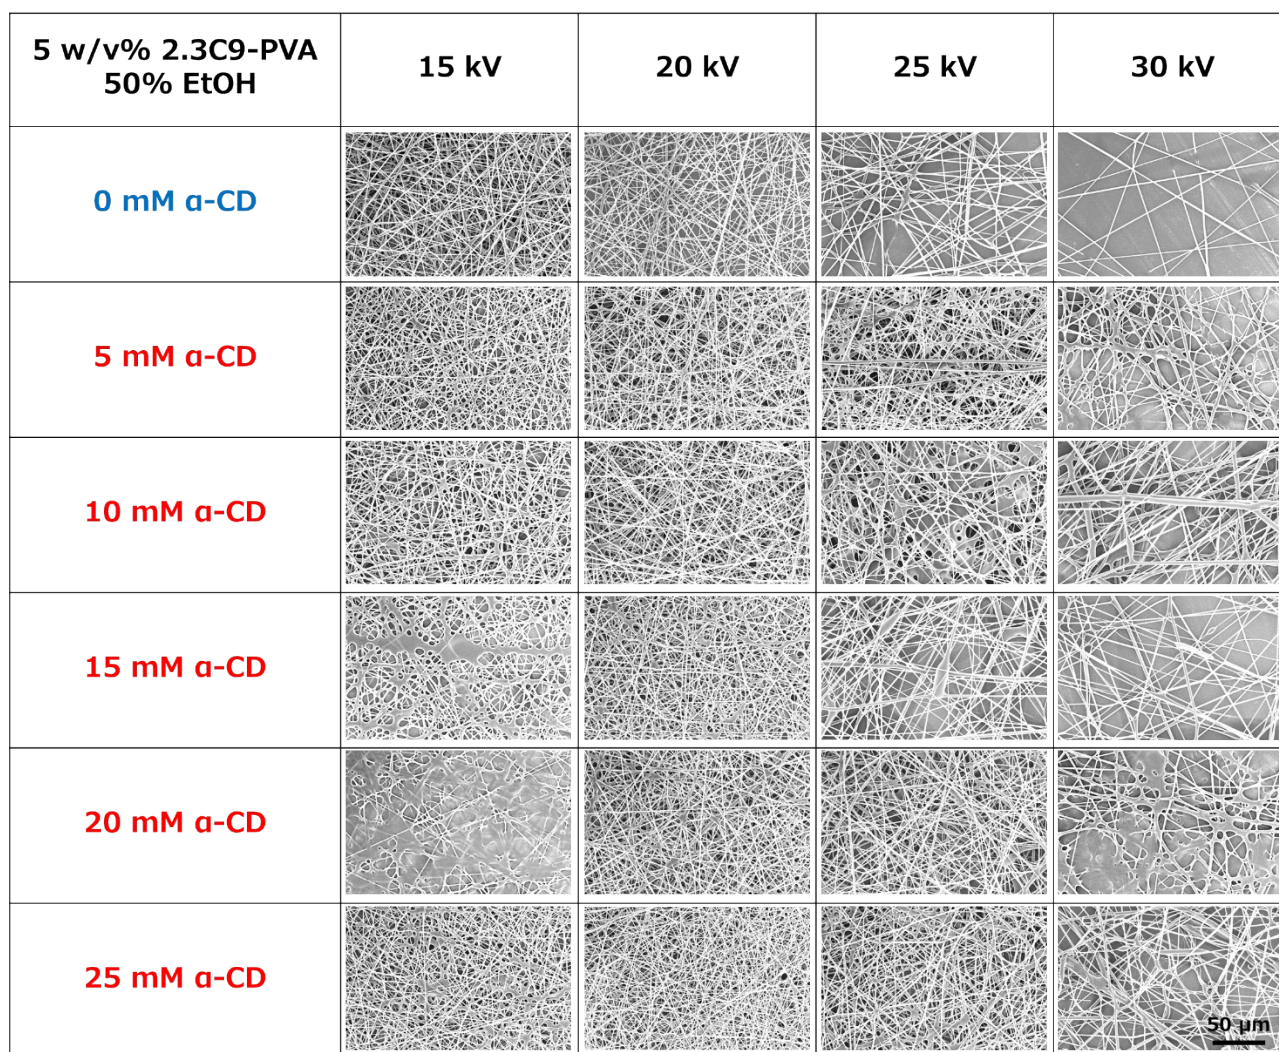

**Figure S3.** SEM images of electrospun fiber sheets using different  $\alpha$ -CD/2.3C9-PVA solutions (5 w/v % 2.3C9-PVA, 50 % EtOH, 0–25 mM  $\alpha$ -CD) under the voltage of 15–30 kV (scale bar = 50  $\mu$ m).
